# Supplementary material
Source: PubMed Central journal article supplement (PMC9177713)

# THE LANCET

## Respiratory Medicine

### **Supplementary appendix**

This appendix formed part of the original submission and has been peer reviewed.  
We post it as supplied by the authors.

Supplement to: Bowman WS, Newton CA, Linderholm AL, et al. Proteomic biomarkers of progressive fibrosing interstitial lung disease: a multicentre cohort analysis. *Lancet Respir Med* 2022; published online Jan 18. [https://doi.org/10.1016/S2213-2600\(21\)00503-8](https://doi.org/10.1016/S2213-2600(21)00503-8).

# Online Appendix

## Proteomic Biomarkers of Progressive Fibrosing Interstitial Lung Disease

Willis S. Bowman, MD; Chad A. Newton, MD; Angela L. Linderholm, PhD; Megan L. Neely, PhD; Janelle Vu Pugashetti, MD; Bhavika Kaul, MD; Vivian Vo, BS; Gabrielle A. Echt, BS; William Leon, MD; Rupal J. Shah, MD; Yong Huang, MD; Prof Christine Kim Garcia, MD; Prof Paul J. Wolters, MD; Justin M. Oldham, MD

|                                                                                                                                                                                                          |              |
|----------------------------------------------------------------------------------------------------------------------------------------------------------------------------------------------------------|--------------|
| <b>Figure S1.</b> Proportion of patients experiencing ILD progression stratified by interval between ILD diagnosis and research blood draw .....                                                         | <b>2</b>     |
| <b>Table S1.</b> Discovery cohort association between all biomarkers and PF-ILD phenotype.....                                                                                                           | <b>3-12</b>  |
| <b>Table S2.</b> PF-ILD association for validated biomarkers in combined discovery and validation cohorts.....                                                                                           | <b>13</b>    |
| <b>Table S3.</b> Association between validated biomarkers of PF-ILD and individual outcomes.....                                                                                                         | <b>14</b>    |
| <b>Table S4.</b> HRCT morphology-stratified association between validated biomarkers and PF-ILD phenotype in combined discovery and validation cohort.....                                               | <b>15</b>    |
| <b>Table S5.</b> GAP index-stratified PF-ILD association for validated biomarkers in combined discovery and validation cohorts.....                                                                      | <b>16</b>    |
| <b>Figure S2.</b> Scatter plots and linear regression estimates assessing the association between validated biomarkers and baseline GAP stage.....                                                       | <b>17-19</b> |
| <b>Figure S3.</b> Pathway (a) and network (b) analysis of proteins associated with PF-ILD in the combined cohort at false discovery rate of <0.05.....                                                   | <b>20</b>    |
| <b>Table S6.</b> Derivation cohort proteomic signature test performance characteristics by proteomic score threshold.....                                                                                | <b>21</b>    |
| <b>Table S7.</b> PF-ILD Proteomic Signature Test Performance .....                                                                                                                                       | <b>22</b>    |
| <b>Figure S4.</b> Theoretical ILD clinical trial sample size based on estimated one-year change in FVC for overall cohort (a) and when restricted to those with a high-risk proteomic signature (b)..... | <b>23</b>    |

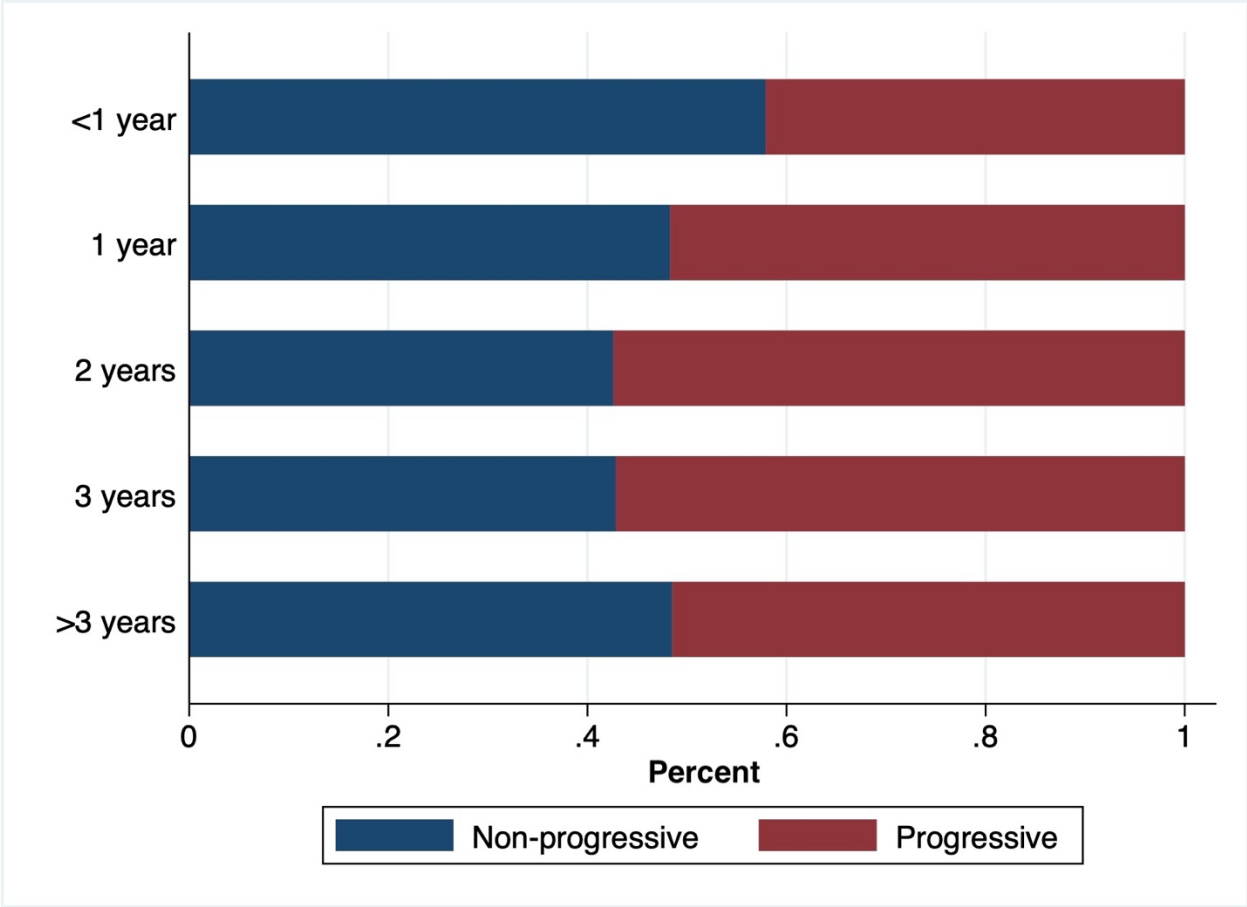

**Figure S1.** Proportion of patients experiencing ILD progression stratified by interval between ILD diagnosis and research blood draw.

**Table S1. Discovery cohort association between all biomarkers and PF-ILD phenotype**

| Gene     | Protein                                                        | Uniprot ID | OR   | 95% CI |      | FDR q-value  |
|----------|----------------------------------------------------------------|------------|------|--------|------|--------------|
| ACTN4*   | Alpha-actinin-4                                                | O43707     | 1.24 | 0.85   | 1.84 | 0.619        |
| ADA      | Adenosine deaminase                                            | P00813     | 1.01 | 0.67   | 1.50 | 0.998        |
| ADAM23   | Disintegrin and metalloproteinase domain-containing protein 23 | O75077     | 0.82 | 0.53   | 1.28 | 0.736        |
| ADGRE2   | Adhesion G protein-coupled receptor E2                         | Q9UHX3     | 1.14 | 0.75   | 1.74 | 0.852        |
| AGER     | Advanced glycosylation end product-specific receptor           | Q15109     | 0.65 | 0.50   | 0.85 | <b>0.027</b> |
| AGRN     | Agrin                                                          | O00468     | 1.56 | 1.05   | 2.34 | 0.172        |
| AGRP     | Agouti-related protein                                         | O00253     | 1.19 | 0.91   | 1.56 | 0.534        |
| ALDH3A1  | Aldehyde dehydrogenase, dimeric NADP-preferring                | P30838     | 1.04 | 0.85   | 1.26 | 0.943        |
| AMBN     | Ameloblastin                                                   | Q9NP70     | 0.87 | 0.53   | 1.37 | 0.888        |
| AMN      | Protein amnionless [Cleaved into: Soluble protein amnionless]  | Q9BXJ7     | 1.12 | 0.83   | 1.51 | 0.793        |
| ANGPT1   | Angiopoietin-1                                                 | Q15389     | 1.00 | 0.81   | 1.23 | 0.998        |
| ANGPTL2  | Angiopoietin-related protein 2                                 | Q9UKU9     | 1.33 | 0.92   | 1.94 | 0.445        |
| ANGPTL4  | Angiopoietin-related protein 4                                 | Q9BY76     | 1.73 | 1.25   | 2.45 | <b>0.025</b> |
| ANXA11   | Annexin A11                                                    | P50995     | 1.12 | 0.82   | 1.55 | 0.828        |
| AOC1*    | Amiloride-sensitive amine oxidase [copper-containing]          | P19801     | 1.03 | 0.81   | 1.32 | 0.943        |
| ARHGEF12 | Rho guanine nucleotide exchange factor 12                      | Q9NZN5     | 1.02 | 0.85   | 1.24 | 0.949        |
| ARNT*    | Aryl hydrocarbon receptor nuclear translocator                 | P27540     | 0.80 | 0.60   | 1.06 | 0.424        |
| ARTN*    | Artemin                                                        | Q5T4W7     | 0.96 | 0.63   | 1.41 | 0.945        |
| ATP5IF1  | ATPase inhibitor, mitochondrial                                | Q9UII2     | 0.97 | 0.81   | 1.17 | 0.943        |
| AXIN1    | Axin-1                                                         | O15169     | 1.04 | 0.86   | 1.25 | 0.943        |
| B4GALT1  | Beta-1,4-galactosyltransferase 1                               | P15291     | 1.38 | 0.88   | 2.18 | 0.485        |
| BACH1    | Transcription regulator protein BACH1                          | O14867     | 1.03 | 0.82   | 1.29 | 0.945        |
| BANK1    | B-cell scaffold protein with ankyrin repeats                   | Q8NDB2     | 1.03 | 0.86   | 1.23 | 0.943        |
| BCL2L11  | Bcl-2-like protein 11, Isoform BimL                            | O43521-2   | 1.34 | 0.86   | 2.14 | 0.544        |
| BCR      | Breakpoint cluster region protein                              | P11274     | 1.09 | 0.90   | 1.33 | 0.712        |
| BID      | BH3-interacting domain death agonist                           | P55957     | 0.93 | 0.74   | 1.16 | 0.828        |
| BSG      | Basigin                                                        | P35613     | 3.00 | 1.50   | 6.20 | <b>0.033</b> |
| BTN2A1   | Butyrophilin subfamily 2 member A1                             | Q7KYR7     | 0.94 | 0.59   | 1.48 | 0.943        |
| BTN3A2   | Butyrophilin subfamily 3 member A2                             | P78410     | 0.97 | 0.66   | 1.42 | 0.970        |
| C1QA     | Complement C1q subcomponent subunit A                          | P02745     | 1.91 | 1.04   | 3.55 | 0.208        |
| CASP2*   | Caspase-2                                                      | P42575     | 1.07 | 0.84   | 1.36 | 0.895        |
| CCL11    | Eotaxin                                                        | P51671     | 1.47 | 0.97   | 2.25 | 0.308        |
| CCL13    | C-C motif chemokine 13                                         | Q99616     | 1.05 | 0.85   | 1.31 | 0.914        |
| CCL17    | C-C motif chemokine 17                                         | Q92583     | 1.23 | 1.05   | 1.45 | 0.096        |
| CCL20    | C-C motif chemokine 20                                         | P78556     | 1.26 | 1.04   | 1.53 | 0.126        |
| CCL21    | C-C motif chemokine 21                                         | O00585     | 1.04 | 0.78   | 1.40 | 0.943        |
| CCL22    | C-C motif chemokine 22                                         | O00626     | 1.25 | 0.97   | 1.62 | 0.352        |
| CCL23    | C-C motif chemokine 23                                         | P55773     | 1.62 | 1.15   | 2.31 | 0.073        |

|                   |                                                               |        |      |      |      |              |
|-------------------|---------------------------------------------------------------|--------|------|------|------|--------------|
| CCL24             | C-C motif chemokine 24                                        | O00175 | 1.28 | 1.05 | 1.57 | 0.119        |
| CCL25             | C-C motif chemokine 25                                        | O15444 | 1.20 | 0.88 | 1.66 | 0.593        |
| CCL26             | C-C motif chemokine 26                                        | Q9Y258 | 0.96 | 0.79 | 1.15 | 0.933        |
| CCL28             | C-C motif chemokine 28                                        | Q9NRJ3 | 1.02 | 0.79 | 1.31 | 0.982        |
| CCL3              | C-C motif chemokine 3                                         | P10147 | 1.01 | 0.83 | 1.23 | 0.993        |
| CCL4              | C-C motif chemokine 4                                         | P13236 | 1.00 | 0.83 | 1.20 | 0.998        |
| CCL7              | C-C motif chemokine 7                                         | P80098 | 1.18 | 1.00 | 1.41 | 0.258        |
| CCN2              | CCN family member 2                                           | P29279 | 1.13 | 0.82 | 1.56 | 0.815        |
| CD160             | CD160 antigen                                                 | O95971 | 0.88 | 0.69 | 1.11 | 0.615        |
| CD200             | OX-2 membrane glycoprotein                                    | P41217 | 0.89 | 0.54 | 1.48 | 0.934        |
| CD200R1           | Cell surface glycoprotein CD200 receptor 1                    | Q8TD46 | 0.67 | 0.46 | 0.97 | 0.197        |
| CD22              | B-cell receptor CD22                                          | P20273 | 0.96 | 0.75 | 1.25 | 0.943        |
| CD244             | Natural killer cell receptor 2B4                              | Q9BZW8 | 0.75 | 0.48 | 1.19 | 0.562        |
| CD276             | CD276 antigen                                                 | Q5ZPR3 | 1.67 | 1.19 | 2.39 | <b>0.048</b> |
| CD4               | T-cell surface glycoprotein CD4                               | P01730 | 1.56 | 0.94 | 2.63 | 0.353        |
| CD40              | Tumor necrosis factor receptor superfamily member 5           | P25942 | 1.01 | 0.75 | 1.36 | 0.997        |
| CD40LG            | CD40 ligand                                                   | P29965 | 1.11 | 0.90 | 1.38 | 0.711        |
| CD48              | CD48 antigen                                                  | P09326 | 0.95 | 0.65 | 1.40 | 0.943        |
| CD58              | Lymphocyte function-associated antigen 3                      | P19256 | 0.69 | 0.33 | 1.40 | 0.684        |
| CD6               | T-cell differentiation antigen CD6                            | P30203 | 0.81 | 0.62 | 1.06 | 0.424        |
| CD70              | CD70 antigen                                                  | P32970 | 1.16 | 0.82 | 1.63 | 0.745        |
| CD79B             | B-cell antigen receptor complex-associated protein beta chain | P40259 | 1.24 | 0.95 | 1.63 | 0.423        |
| CD83              | CD83 antigen                                                  | Q01151 | 1.22 | 0.88 | 1.71 | 0.582        |
| CD84              | SLAM family member 5                                          | Q9UIB8 | 0.78 | 0.50 | 1.21 | 0.608        |
| CDON              | Cell adhesion molecule-related/down-regulated by oncogenes    | Q4KMG0 | 0.92 | 0.58 | 1.48 | 0.943        |
| CDSN              | Corneodesmosin                                                | Q15517 | 1.02 | 0.72 | 1.43 | 0.993        |
| CEACAM21          | Carcinoembryonic antigen-related cell adhesion molecule 21    | Q3KPI0 | 1.05 | 0.87 | 1.27 | 0.895        |
| CEP164*           | Centrosomal protein of 164 kDa                                | Q9UPV0 | 0.95 | 0.74 | 1.20 | 0.928        |
| CHRD1             | Chordin-like protein 1                                        | Q9BU40 | 1.27 | 0.90 | 1.80 | 0.520        |
| CKAP4             | Cytoskeleton-associated protein 4                             | Q07065 | 1.74 | 1.15 | 2.68 | 0.095        |
| CKMT1A_CK<br>MT1B | Creatine kinase U-type, mitochondrial                         | P12532 | 1.11 | 0.89 | 1.37 | 0.711        |
| CLEC4A            | C-type lectin domain family 4 member A                        | Q9UMR7 | 1.36 | 0.92 | 2.03 | 0.424        |
| CLEC4C            | C-type lectin domain family 4 member C                        | Q8WTT0 | 0.84 | 0.67 | 1.05 | 0.424        |
| CLEC4D            | C-type lectin domain family 4 member D                        | Q8WXI8 | 1.40 | 1.09 | 1.83 | 0.096        |
| CLEC4G            | C-type lectin domain family 4 member G                        | Q6UXB4 | 1.31 | 0.83 | 2.09 | 0.596        |
| CLEC7A            | C-type lectin domain family 7 member A                        | Q9BXN2 | 1.08 | 0.84 | 1.39 | 0.882        |
| CLIP2             | CAP-Gly domain-containing linker protein 2                    | Q9UDT6 | 1.08 | 0.92 | 1.28 | 0.716        |
| CLSTN2            | Calsyntenin-2                                                 | Q9H4D0 | 1.17 | 0.81 | 1.69 | 0.748        |
| CNTNAP2           | Contactin-associated protein-like 2                           | Q9UHC6 | 0.81 | 0.56 | 1.15 | 0.575        |
| COL9A1            | Collagen alpha-1                                              | P20849 | 0.78 | 0.57 | 1.07 | 0.424        |

|         |                                                                               |        |      |      |      |              |
|---------|-------------------------------------------------------------------------------|--------|------|------|------|--------------|
| COLEC12 | Collectin-12                                                                  | Q5KU26 | 1.66 | 1.10 | 2.53 | 0.126        |
| CRELD2  | Protein disulfide isomerase CRELD2                                            | Q6UXH1 | 1.06 | 0.79 | 1.41 | 0.943        |
| CRHBP   | Corticotropin-releasing factor-binding protein                                | P24387 | 0.93 | 0.58 | 1.49 | 0.943        |
| CRIM1   | Cysteine-rich motor neuron 1 protein                                          | Q9NZV1 | 1.96 | 1.15 | 3.42 | 0.122        |
| CRKL    | Crk-like protein                                                              | P46109 | 1.03 | 0.86 | 1.24 | 0.943        |
| CRLF1   | Cytokine receptor-like factor 1                                               | O75462 | 1.35 | 0.85 | 2.20 | 0.553        |
| CSF1    | Macrophage colony-stimulating factor 1                                        | P09603 | 1.58 | 1.01 | 2.52 | 0.254        |
| CSF3    | Granulocyte colony-stimulating factor                                         | P09919 | 1.19 | 0.90 | 1.59 | 0.564        |
| CST7    | Cystatin-F                                                                    | O76096 | 1.43 | 1.19 | 1.75 | <b>0.006</b> |
| CTRC    | Chymotrypsin-C                                                                | Q99895 | 0.93 | 0.76 | 1.14 | 0.828        |
| CTSC    | Dipeptidyl peptidase 1                                                        | P53634 | 1.20 | 0.87 | 1.64 | 0.608        |
| CTSO    | Cathepsin O                                                                   | P43234 | 0.96 | 0.59 | 1.57 | 0.978        |
| CXADR   | Coxsackievirus and adenovirus receptor                                        | P78310 | 1.31 | 0.95 | 1.81 | 0.402        |
| CXCL1   | Growth-regulated alpha protein                                                | P09341 | 0.99 | 0.83 | 1.17 | 0.975        |
| CXCL10  | C-X-C motif chemokine 10                                                      | P02778 | 0.75 | 0.63 | 0.89 | <b>0.025</b> |
| CXCL12  | Stromal cell-derived factor 1                                                 | P48061 | 1.12 | 0.74 | 1.68 | 0.895        |
| CXCL14  | C-X-C motif chemokine 14                                                      | O95715 | 0.95 | 0.72 | 1.26 | 0.943        |
| CXCL17  | C-X-C motif chemokine 17                                                      | Q6UXB2 | 1.68 | 1.28 | 2.24 | <b>0.006</b> |
| CXCL3   | C-X-C motif chemokine 3                                                       | P19876 | 0.97 | 0.81 | 1.16 | 0.943        |
| CXCL6   | C-X-C motif chemokine 6                                                       | P80162 | 1.09 | 0.88 | 1.36 | 0.782        |
| CXCL8   | Interleukin-8                                                                 | P10145 | 1.39 | 1.08 | 1.80 | 0.106        |
| CXCL9   | C-X-C motif chemokine 9                                                       | Q07325 | 0.86 | 0.72 | 1.01 | 0.308        |
| DAG1    | Dystroglycan                                                                  | Q14118 | 1.01 | 0.72 | 1.40 | 0.998        |
| DAPP1   | Dual adapter for phosphotyrosine and 3-phosphotyrosine and 3-phosphoinositide | Q9UN19 | 0.95 | 0.81 | 1.12 | 0.850        |
| DBNL    | Drebrin-like protein                                                          | Q9UJU6 | 1.08 | 0.89 | 1.31 | 0.788        |
| DECR1   | 2,4-dienoyl-CoA reductase, mitochondrial                                      | Q16698 | 0.95 | 0.79 | 1.14 | 0.895        |
| DFFA    | DNA fragmentation factor subunit alpha                                        | O00273 | 1.11 | 0.89 | 1.39 | 0.712        |
| DGKZ*   | Diacylglycerol kinase zeta                                                    | Q13574 | 1.04 | 0.75 | 1.45 | 0.943        |
| DNAJA2  | DnaJ homolog subfamily A member 2                                             | O60884 | 1.11 | 0.89 | 1.39 | 0.711        |
| DNER    | Delta and Notch-like epidermal growth factor-related receptor                 | Q8NFT8 | 0.89 | 0.52 | 1.51 | 0.930        |
| DNPH1   | 2'-deoxynucleoside 5'-phosphate N-hydrolase 1                                 | O43598 | 0.92 | 0.67 | 1.27 | 0.905        |
| DPP10   | Inactive dipeptidyl peptidase 10                                              | Q8N608 | 1.85 | 1.34 | 2.59 | <b>0.006</b> |
| EDAR    | Tumor necrosis factor receptor superfamily member EDAR                        | Q9UNE0 | 0.83 | 0.71 | 0.98 | 0.168        |
| EGF     | Pro-epidermal growth factor                                                   | P01133 | 1.02 | 0.85 | 1.23 | 0.943        |
| EGLN1   | Egl nine homolog 1                                                            | Q9GZT9 | 1.21 | 1.00 | 1.47 | 0.251        |
| EIF4G1  | Eukaryotic translation initiation factor 4 gamma 1                            | Q04637 | 1.14 | 0.93 | 1.43 | 0.561        |
| EIF5A*  | Eukaryotic translation initiation factor 5A-1                                 | P63241 | 0.91 | 0.51 | 1.59 | 0.943        |
| ENAH    | Protein enabled homolog                                                       | Q8N8S7 | 1.34 | 0.98 | 1.85 | 0.296        |
| ENPP5   | Ectonucleotide pyrophosphatase/phosphodiesterase family member 5              | Q9UJA9 | 1.30 | 0.88 | 1.98 | 0.534        |

|          |                                                                              |        |      |      |      |              |
|----------|------------------------------------------------------------------------------|--------|------|------|------|--------------|
| ENPP7    | Ectonucleotide pyrophosphatase/phosphodiesterase family member 7             | Q6UWV6 | 1.00 | 0.85 | 1.18 | 0.998        |
| EPCAM    | Epithelial cell adhesion molecule                                            | P16422 | 1.00 | 0.83 | 1.20 | 0.998        |
| EPHA1    | Ephrin type-A receptor 1                                                     | P21709 | 0.88 | 0.57 | 1.36 | 0.889        |
| EPO      | Erythropoietin                                                               | P01588 | 1.28 | 1.08 | 1.53 | 0.060        |
| ERBB3    | Receptor tyrosine-protein kinase erbB-3                                      | P21860 | 0.68 | 0.34 | 1.32 | 0.608        |
| ESM1     | Endothelial cell-specific molecule 1                                         | Q9NQ30 | 0.78 | 0.53 | 1.14 | 0.534        |
| F2R      | Proteinase-activated receptor 1                                              | P25116 | 0.97 | 0.76 | 1.25 | 0.945        |
| FABP1    | Fatty acid-binding protein, liver                                            | P07148 | 1.13 | 0.97 | 1.32 | 0.423        |
| FABP9    | Fatty acid-binding protein 9                                                 | Q0Z7S8 | 0.78 | 0.59 | 1.03 | 0.352        |
| FASLG    | Tumor necrosis factor ligand superfamily member 6                            | P48023 | 0.60 | 0.43 | 0.82 | <b>0.028</b> |
| FCAR     | Immunoglobulin alpha Fc receptor                                             | P24071 | 1.71 | 1.27 | 2.33 | <b>0.012</b> |
| FCRL2    | Fc receptor-like protein 2                                                   | Q96LA5 | 1.02 | 0.79 | 1.32 | 0.978        |
| FCRL3    | Fc receptor-like protein 3                                                   | Q96P31 | 0.91 | 0.71 | 1.17 | 0.815        |
| FCRL6    | Fc receptor-like protein 6                                                   | Q6DN72 | 1.04 | 0.85 | 1.27 | 0.943        |
| FGF19    | Fibroblast growth factor 19                                                  | O95750 | 0.88 | 0.72 | 1.07 | 0.534        |
| FGF2*    | Fibroblast growth factor 2                                                   | P09038 | 1.25 | 1.00 | 1.56 | 0.258        |
| FGF5     | Fibroblast growth factor 5                                                   | P12034 | 1.11 | 0.76 | 1.62 | 0.895        |
| FIS1     | Mitochondrial fission 1 protein                                              | Q9Y3D6 | 0.92 | 0.74 | 1.14 | 0.782        |
| FKBP1B*  | Peptidyl-prolyl cis-trans isomerase FKBP1B                                   | P68106 | 1.04 | 0.90 | 1.20 | 0.914        |
| FLT3LG   | Fms-related tyrosine kinase 3 ligand                                         | P49771 | 1.32 | 0.93 | 1.89 | 0.424        |
| FOXO1    | Forkhead box protein O1                                                      | Q12778 | 0.98 | 0.81 | 1.18 | 0.950        |
| FST      | Follistatin                                                                  | P19883 | 1.06 | 0.74 | 1.53 | 0.943        |
| FSTL3    | Follistatin-related protein 3                                                | O95633 | 1.79 | 1.25 | 2.59 | <b>0.027</b> |
| FXYD5*   | FXYD domain-containing ion transport regulator 5                             | Q96DB9 | 1.01 | 0.83 | 1.23 | 0.997        |
| GAL      | Galanin peptides [Cleaved into: Galanin; Galanin message-associated peptide] | P22466 | 0.88 | 0.70 | 1.11 | 0.662        |
| GALNT3   | Polypeptide N-acetylgalactosaminyltransferase 3                              | Q14435 | 1.18 | 0.83 | 1.69 | 0.711        |
| GBP2*    | Guanylate-binding protein 2                                                  | P32456 | 1.18 | 0.95 | 1.47 | 0.463        |
| GLOD4    | Glyoxalase domain-containing protein 4                                       | Q9HC38 | 1.06 | 0.68 | 1.66 | 0.943        |
| GMPR     | GMP reductase 1                                                              | P36959 | 0.96 | 0.72 | 1.27 | 0.943        |
| GOPC     | Golgi-associated PDZ and coiled-coil motif-containing protein                | Q9HD26 | 1.03 | 0.87 | 1.22 | 0.943        |
| GZMA     | Granzyme A                                                                   | P12544 | 0.99 | 0.80 | 1.22 | 0.993        |
| GZMB     | Granzyme B                                                                   | P10144 | 1.00 | 0.88 | 1.15 | 0.997        |
| HCLS1    | Hematopoietic lineage cell-specific protein                                  | P14317 | 1.05 | 0.78 | 1.40 | 0.943        |
| HEXIM1   | Protein HEXIM1                                                               | O94992 | 1.12 | 0.90 | 1.39 | 0.686        |
| HGF      | Hepatocyte growth factor                                                     | P14210 | 2.29 | 1.53 | 3.49 | <b>0.003</b> |
| HLA-DRA* | HLA class II histocompatibility antigen, DR alpha chain                      | P01903 | 0.86 | 0.56 | 1.30 | 0.815        |
| HLA-E    | HLA class I histocompatibility antigen, alpha chain E                        | P13747 | 1.13 | 0.72 | 1.77 | 0.895        |
| HPCAL1   | Hippocalcin-like protein 1                                                   | P37235 | 1.13 | 0.88 | 1.46 | 0.711        |
| HSD11B1  | Corticosteroid 11-beta-dehydrogenase isozyme 1                               | P28845 | 1.14 | 0.78 | 1.65 | 0.828        |

|         |                                                  |        |      |      |      |              |
|---------|--------------------------------------------------|--------|------|------|------|--------------|
| HSPA1A  | Heat shock 70 kDa protein 1A                     | P0DMV8 | 1.04 | 0.83 | 1.30 | 0.943        |
| ICA1    | Islet cell autoantigen 1                         | Q05084 | 1.08 | 0.88 | 1.33 | 0.821        |
| ICAM4   | Intercellular adhesion molecule 4                | Q14773 | 1.09 | 0.78 | 1.55 | 0.899        |
| IDS     | Iduronate 2-sulfatase                            | P22304 | 0.32 | 0.05 | 1.86 | 0.545        |
| IFNG*   | Interferon gamma                                 | P01579 | 0.90 | 0.78 | 1.03 | 0.424        |
| IFNGR1  | Interferon gamma receptor 1                      | P15260 | 1.42 | 0.79 | 2.59 | 0.582        |
| IFNLR1  | Interferon lambda receptor 1                     | Q8IU57 | 0.66 | 0.40 | 1.06 | 0.362        |
| IKBKG   | NF-kappa-B essential modulator                   | Q9Y6K9 | 1.01 | 0.82 | 1.24 | 0.997        |
| IL10    | Interleukin-10                                   | P22301 | 1.04 | 0.89 | 1.22 | 0.914        |
| IL10RA  | Interleukin-10 receptor subunit alpha            | Q13651 | 1.39 | 1.05 | 1.86 | 0.155        |
| IL10RB  | Interleukin-10 receptor subunit beta             | Q08334 | 1.43 | 0.88 | 2.34 | 0.471        |
| IL11*   | Interleukin-11                                   | P20809 | 0.98 | 0.78 | 1.24 | 0.979        |
| IL12B   | Interleukin-12 subunit beta                      | P29460 | 0.82 | 0.68 | 0.98 | 0.171        |
| IL12RB1 | Interleukin-12 receptor subunit beta-1           | P42701 | 0.88 | 0.59 | 1.30 | 0.828        |
| IL13*   | Interleukin-13                                   | P35225 | 0.87 | 0.65 | 1.13 | 0.704        |
| IL15    | Interleukin-15                                   | P40933 | 1.33 | 0.94 | 1.90 | 0.417        |
| IL15RA  | Interleukin-15 receptor subunit alpha            | Q13261 | 1.05 | 0.73 | 1.51 | 0.943        |
| IL16    | Pro-interleukin-16 [Cleaved into: Interleukin-16 | Q14005 | 1.23 | 0.92 | 1.66 | 0.497        |
| IL17A*  | Interleukin-17A                                  | Q16552 | 0.94 | 0.66 | 1.32 | 0.943        |
| IL17C   | Interleukin-17C                                  | Q9P0M4 | 1.39 | 1.13 | 1.71 | <b>0.029</b> |
| IL17D   | Interleukin-17D                                  | Q8TAD2 | 0.92 | 0.63 | 1.34 | 0.936        |
| IL17F*  | Interleukin-17F                                  | Q96PD4 | 0.90 | 0.73 | 1.10 | 0.686        |
| IL17RB  | Interleukin-17 receptor B                        | Q9NRM6 | 1.34 | 1.00 | 1.81 | 0.258        |
| IL18    | Interleukin-18                                   | Q14116 | 1.01 | 0.73 | 1.40 | 0.997        |
| IL18R1  | Interleukin-18 receptor 1                        | Q13478 | 1.06 | 0.68 | 1.66 | 0.943        |
| IL1A*   | Interleukin-1 alpha                              | P01583 | 0.99 | 0.76 | 1.28 | 0.997        |
| IL1B    | Interleukin-1 beta                               | P01584 | 1.19 | 0.92 | 1.56 | 0.534        |
| IL1R2   | Interleukin-1 receptor type 2                    | P27930 | 1.58 | 0.90 | 2.85 | 0.424        |
| IL1RL2  | Interleukin-1 receptor-like 2                    | Q9HB29 | 0.88 | 0.60 | 1.28 | 0.828        |
| IL1RN   | Interleukin-1 receptor antagonist protein        | P18510 | 1.57 | 1.24 | 2.00 | <b>0.006</b> |
| IL2     | Interleukin-2                                    | P60568 | 0.93 | 0.59 | 1.47 | 0.943        |
| IL20*   | Interleukin-20                                   | Q9NYY1 | 0.95 | 0.69 | 1.30 | 0.943        |
| IL20RA* | Interleukin-20 receptor subunit alpha            | Q9UHF4 | 1.18 | 0.82 | 1.72 | 0.716        |
| IL22RA1 | Interleukin-22 receptor subunit alpha-1          | Q8N6P7 | 0.84 | 0.57 | 1.22 | 0.716        |
| IL24*   | Interleukin-24                                   | Q13007 | 0.99 | 0.73 | 1.32 | 0.993        |
| IL2RB*  | Interleukin-2 receptor subunit beta              | P14784 | 0.95 | 0.64 | 1.39 | 0.943        |
| IL32    | Interleukin-32                                   | P24001 | 1.02 | 0.77 | 1.35 | 0.979        |
| IL33*   | Interleukin-33                                   | O95760 | 0.86 | 0.63 | 1.18 | 0.712        |
| IL3RA   | Interleukin-3 receptor subunit alpha             | P26951 | 0.98 | 0.58 | 1.65 | 0.993        |
| IL4*    | Interleukin-4                                    | P05112 | 1.15 | 0.92 | 1.45 | 0.569        |



|        |                                                                                   |        |      |      |      |                  |
|--------|-----------------------------------------------------------------------------------|--------|------|------|------|------------------|
| IL4R   | Interleukin-4 receptor subunit alpha                                              | P24394 | 1.52 | 1.08 | 2.16 | 0.126            |
| IL5*   | Interleukin-5                                                                     | P05113 | 0.93 | 0.83 | 1.03 | 0.520            |
| IL5RA  | Interleukin-5 receptor subunit alpha                                              | Q01344 | 1.38 | 1.07 | 1.80 | 0.118            |
| IL6    | Interleukin-6                                                                     | P05231 | 1.19 | 1.02 | 1.39 | 0.187            |
| IL7    | Interleukin-7                                                                     | P13232 | 1.06 | 0.83 | 1.34 | 0.928            |
| IRAK1  | Interleukin-1 receptor-associated kinase 1                                        | P51617 | 1.10 | 0.87 | 1.39 | 0.775            |
| IRAK4  | Interleukin-1 receptor-associated kinase 4                                        | Q9NWZ3 | 1.03 | 0.86 | 1.23 | 0.943            |
| ISM1   | Isthmin-1                                                                         | B1AKI9 | 1.03 | 0.70 | 1.53 | 0.975            |
| ITGA11 | Integrin alpha-11                                                                 | Q9UKX5 | 0.58 | 0.39 | 0.87 | 0.088            |
| ITGA6  | Integrin alpha-6                                                                  | P23229 | 0.76 | 0.57 | 1.01 | 0.278            |
| ITGB6  | Integrin beta-6                                                                   | P18564 | 3.17 | 2.20 | 4.70 | <b>&lt;0.001</b> |
| ITM2A  | Integral membrane protein 2A                                                      | O43736 | 1.19 | 0.90 | 1.58 | 0.575            |
| JCHAIN | Immunoglobulin J chain                                                            | P01591 | 1.05 | 0.83 | 1.32 | 0.940            |
| JUN    | Transcription factor AP-1                                                         | P05412 | 1.40 | 1.07 | 1.87 | 0.126            |
| KLRB1  | Killer cell lectin-like receptor subfamily B member 1                             | Q12918 | 0.79 | 0.57 | 1.09 | 0.471            |
| KLRD1  | Natural killer cells antigen CD94                                                 | Q13241 | 1.13 | 0.85 | 1.52 | 0.748            |
| KRT19  | Keratin, type I cytoskeletal 19                                                   | P08727 | 2.10 | 1.69 | 2.66 | <b>&lt;0.001</b> |
| KYNU   | Kynureninase                                                                      | Q16719 | 1.12 | 0.76 | 1.64 | 0.889            |
| LAIR1  | Leukocyte-associated immunoglobulin-like receptor 1                               | Q6GTX8 | 1.14 | 0.85 | 1.52 | 0.740            |
| LAMA4  | Laminin subunit alpha-4                                                           | Q16363 | 0.70 | 0.47 | 1.04 | 0.349            |
| LAMP3  | Lysosome-associated membrane glycoprotein 3                                       | Q9UQV4 | 1.19 | 0.81 | 1.75 | 0.716            |
| LAP3   | Cytosol aminopeptidase                                                            | P28838 | 0.82 | 0.59 | 1.13 | 0.569            |
| LAT    | Linker for activation of T-cells family member 1                                  | O43561 | 1.05 | 0.82 | 1.34 | 0.943            |
| LGALS4 | Galectin-4                                                                        | P56470 | 1.41 | 1.09 | 1.84 | 0.096            |
| LGALS9 | Galectin-9                                                                        | O00182 | 1.26 | 0.90 | 1.78 | 0.520            |
| LGMN   | Legumain<br>Phospholysine phosphohistidine inorganic pyrophosphate<br>phosphatase | Q99538 | 0.92 | 0.61 | 1.39 | 0.943            |
| LHPP   | Leukemia inhibitory factor receptor                                               | Q9H008 | 1.08 | 0.82 | 1.41 | 0.895            |
| LIFR   | Leukemia inhibitory factor receptor                                               | P42702 | 2.54 | 1.39 | 4.73 | <b>0.036</b>     |
| LILRB4 | Leukocyte immunoglobulin-like receptor subfamily B member 4                       | Q8NHJ6 | 1.01 | 0.73 | 1.40 | 0.997            |
| LRRN1  | Leucine-rich repeat neuronal protein 1                                            | Q6UXX5 | 0.57 | 0.38 | 0.84 | 0.055            |
| LSP1   | Lymphocyte-specific protein 1                                                     | P33241 | 1.23 | 0.93 | 1.63 | 0.471            |
| LTA    | Lymphotoxin-alpha                                                                 | P01374 | 0.77 | 0.57 | 1.03 | 0.346            |
| LTBR   | Tumor necrosis factor receptor superfamily member 3                               | P36941 | 1.68 | 1.09 | 2.62 | 0.144            |
| LTO1*  | Protein LTO1 homolog                                                              | Q8WV07 | 0.81 | 0.53 | 1.19 | 0.686            |
| LY6D   | Lymphocyte antigen 6D                                                             | Q14210 | 1.28 | 0.90 | 1.81 | 0.498            |
| LY75   | Lymphocyte antigen 75                                                             | O60449 | 1.05 | 0.71 | 1.56 | 0.943            |
| LY9    | T-lymphocyte surface antigen Ly-9                                                 | Q9HBG7 | 1.04 | 0.69 | 1.58 | 0.952            |
| MANF   | Mesencephalic astrocyte-derived neurotrophic factor                               | P55145 | 1.05 | 0.88 | 1.26 | 0.895            |
| MAP2K6 | Dual specificity mitogen-activated protein kinase kinase 6                        | P52564 | 1.02 | 0.83 | 1.24 | 0.978            |
| MAPK9  | Mitogen-activated protein kinase 9                                                | P45984 | 1.08 | 0.77 | 1.52 | 0.925            |

|           |                                                                   |               |      |      |      |              |
|-----------|-------------------------------------------------------------------|---------------|------|------|------|--------------|
| MATN2     | Matrilin-2                                                        | O00339        | 1.45 | 0.94 | 2.28 | 0.371        |
| MEGF10    | Multiple epidermal growth factor-like domains protein 10          | Q96KG7        | 0.67 | 0.44 | 1.01 | 0.260        |
| MEPE      | Matrix extracellular phosphoglycoprotein                          | Q9NQ76        | 0.61 | 0.38 | 0.95 | 0.174        |
| MERTK     | Tyrosine-protein kinase Mer                                       | Q12866        | 1.53 | 0.87 | 2.69 | 0.445        |
| METAP1D   | Methionine aminopeptidase 1D, mitochondrial                       | Q6UB28        | 1.01 | 0.83 | 1.22 | 0.997        |
| MGLL      | Monoglyceride lipase                                              | Q99685        | 0.94 | 0.76 | 1.18 | 0.897        |
| MGMT      | Methylated-DNA--protein-cysteine methyltransferase                | P16455        | 0.94 | 0.80 | 1.12 | 0.828        |
| MICB_MICA | MHC class I polypeptide-related sequence B_A                      | Q29980_Q29983 | 1.05 | 0.95 | 1.17 | 0.711        |
| MILR1     | Allergin-1                                                        | Q7Z6M3        | 1.40 | 1.06 | 1.86 | 0.144        |
| MLN       | Promotilin [Cleaved into: Motilin; Motilin-associated peptide]    | P12872        | 1.14 | 0.96 | 1.36 | 0.464        |
| MMP1      | Interstitial collagenase                                          | P03956        | 1.39 | 1.13 | 1.74 | <b>0.036</b> |
| MMP10     | Stromelysin-2                                                     | P09238        | 1.62 | 1.30 | 2.06 | <b>0.002</b> |
| MPIG6B    | Megakaryocyte and platelet inhibitory receptor G6b                | O95866        | 1.15 | 0.86 | 1.58 | 0.712        |
| MVK       | Mevalonate kinase                                                 | Q03426        | 1.15 | 0.93 | 1.41 | 0.534        |
| MYO9B     | Unconventional myosin-IXb                                         | Q13459        | 1.06 | 0.88 | 1.28 | 0.835        |
| MZB1      | Marginal zone B- and B1-cell-specific protein                     | Q8WU39        | 1.36 | 1.04 | 1.78 | 0.168        |
| NBN       | Nibrin                                                            | O60934        | 1.06 | 0.89 | 1.25 | 0.828        |
| NCF2      | Neutrophil cytosol factor 2                                       | P19878        | 1.15 | 0.98 | 1.36 | 0.352        |
| NCK2      | Cytoplasmic protein NCK2                                          | O43639        | 1.00 | 0.85 | 1.18 | 0.998        |
| NCLN*     | Nicalin                                                           | Q969V3        | 0.88 | 0.63 | 1.14 | 0.712        |
| NCR1      | Natural cytotoxicity triggering receptor 1                        | O76036        | 0.97 | 0.73 | 1.29 | 0.952        |
| NELL2     | Protein kinase C-binding protein NELL2                            | Q99435        | 1.64 | 1.10 | 2.47 | 0.126        |
| NFASC     | Neurofascin                                                       | O94856        | 1.33 | 0.85 | 2.10 | 0.561        |
| NFATC1    | Nuclear factor of activated T-cells, cytoplasmic 1                | O95644        | 0.97 | 0.80 | 1.18 | 0.943        |
| NFATC3*   | Nuclear factor of activated T-cells, cytoplasmic 3                | Q12968        | 1.04 | 0.81 | 1.34 | 0.943        |
| NME3      | Nucleoside diphosphate kinase 3                                   | Q13232        | 0.93 | 0.55 | 1.57 | 0.943        |
| NPPC      | C-type natriuretic peptide [Cleaved into: CNP-22; CNP-29; CNP-53] | P23582        | 1.16 | 0.89 | 1.51 | 0.608        |
| NRTN*     | Neurturin                                                         | Q99748        | 0.80 | 0.58 | 1.10 | 0.512        |
| NT5C3A    | Cytosolic 5'-nucleotidase 3A                                      | Q9H0P0        | 1.02 | 0.83 | 1.25 | 0.975        |
| NTF3      | Neurotrophin-3                                                    | P20783        | 1.05 | 0.71 | 1.55 | 0.943        |
| NUB1      | NEDD8 ultimate buster 1                                           | Q9Y5A7        | 1.00 | 0.83 | 1.20 | 0.998        |
| NUDC      | Nuclear migration protein nudC                                    | Q9Y266        | 1.15 | 0.86 | 1.56 | 0.711        |
| OMD       | Osteomodulin                                                      | Q99983        | 0.90 | 0.66 | 1.24 | 0.850        |
| OSCAR     | Osteoclast-associated immunoglobulin-like receptor                | Q8IYS5        | 1.06 | 0.72 | 1.57 | 0.943        |
| OSM       | Oncostatin-M                                                      | P13725        | 1.38 | 1.15 | 1.66 | <b>0.012</b> |
| PADI2     | Protein-arginine deiminase type-2                                 | Q9Y2J8        | 1.17 | 0.96 | 1.44 | 0.424        |
| PAPPA     | Pappalysin-1                                                      | Q13219        | 1.16 | 0.85 | 1.58 | 0.711        |
| PARP1     | Poly [ADP-ribose] polymerase 1                                    | P09874        | 0.95 | 0.80 | 1.12 | 0.889        |
| PCDH1     | Protocadherin-1                                                   | Q08174        | 0.57 | 0.27 | 1.16 | 0.424        |
| PDGFB     | Platelet-derived growth factor subunit B                          | P01127        | 1.03 | 0.84 | 1.27 | 0.943        |

|          |                                                                                  |        |      |      |      |                  |
|----------|----------------------------------------------------------------------------------|--------|------|------|------|------------------|
| PDLIM7   | PDZ and LIM domain protein 7                                                     | Q9NR12 | 1.02 | 0.88 | 1.18 | 0.943            |
| PGF      | Placenta growth factor                                                           | P49763 | 1.22 | 0.75 | 2.00 | 0.758            |
| PIK3AP1  | Phosphoinositide 3-kinase adapter protein 1                                      | Q6ZUJ8 | 1.00 | 0.80 | 1.25 | 0.998            |
| PKLR     | Pyruvate kinase PKLR                                                             | P30613 | 1.04 | 0.82 | 1.32 | 0.943            |
| PLA2G4A  | Cytosolic phospholipase A2                                                       | P47712 | 1.00 | 0.83 | 1.22 | 0.998            |
| PLAUR    | Urokinase plasminogen activator surface receptor                                 | Q03405 | 3.78 | 2.34 | 6.29 | <b>&lt;0.001</b> |
| PLXNA4   | Plexin-A4                                                                        | Q9HCM2 | 0.92 | 0.74 | 1.13 | 0.775            |
| PNLIPRP2 | Pancreatic lipase-related protein 2                                              | P54317 | 1.02 | 0.96 | 1.08 | 0.852            |
| PNPT1*   | Polyribonucleotide nucleotidyltransferase 1, mitochondrial                       | Q8TCS8 | 0.90 | 0.75 | 1.07 | 0.561            |
| PON3     | Serum paraoxonase/lactonase 3                                                    | Q15166 | 0.84 | 0.55 | 1.24 | 0.744            |
| PPP1R9B  | Neurabin-2                                                                       | Q96SB3 | 1.03 | 0.87 | 1.23 | 0.943            |
| PRDX3*   | Thioredoxin-dependent peroxide reductase, mitochondrial                          | P30048 | 0.96 | 0.78 | 1.17 | 0.943            |
| PRDX5    | Peroxiredoxin-5, mitochondrial                                                   | P30044 | 1.09 | 0.84 | 1.43 | 0.828            |
| PREB*    | Prolactin regulatory element-binding protein                                     | Q9HCU5 | 1.39 | 0.92 | 2.13 | 0.424            |
| PRELP    | Prolargin                                                                        | P51888 | 1.06 | 0.66 | 1.73 | 0.943            |
| PRKAB1   | 5'-AMP-activated protein kinase subunit beta-1                                   | Q9Y478 | 1.17 | 0.90 | 1.54 | 0.582            |
| PRKCQ*   | Protein kinase C theta type                                                      | Q04759 | 0.77 | 0.52 | 1.11 | 0.520            |
| PROK1    | Prokineticin-1                                                                   | P58294 | 1.26 | 1.04 | 1.53 | 0.144            |
| PRSS8    | Prostasin                                                                        | Q16651 | 1.94 | 1.34 | 2.84 | <b>0.012</b>     |
| PSIP1    | PC4 and SFRS1-interacting protein                                                | O75475 | 1.07 | 0.91 | 1.25 | 0.783            |
| PSMG3    | Proteasome assembly chaperone 3                                                  | Q9BT73 | 0.99 | 0.71 | 1.40 | 0.998            |
| PSPN     | Persephin<br>Parathyroid hormone/parathyroid hormone-related peptide<br>receptor | O60542 | 1.01 | 0.89 | 1.14 | 0.970            |
| PTH1R    |                                                                                  | Q03431 | 1.34 | 0.85 | 2.12 | 0.545            |
| PTPN6    | Tyrosine-protein phosphatase non-receptor type 6                                 | P29350 | 0.99 | 0.79 | 1.24 | 0.993            |
| PTPRM    | Receptor-type tyrosine-protein phosphatase mu                                    | P28827 | 1.41 | 0.75 | 2.68 | 0.644            |
| PTX3     | Pentraxin-related protein PTX3                                                   | P26022 | 1.28 | 0.94 | 1.74 | 0.424            |
| RAB37*   | Ras-related protein Rab-37                                                       | Q96AX2 | 0.81 | 0.66 | 1.00 | 0.251            |
| RAB6A    | Ras-related protein Rab-6A                                                       | P20340 | 0.73 | 0.52 | 0.99 | 0.258            |
| RABGAP1L | Rab GTPase-activating protein 1-like                                             | Q5R372 | 1.00 | 0.79 | 1.26 | 0.998            |
| REG4     | Regenerating islet-derived protein 4                                             | Q9BYZ8 | 1.33 | 0.99 | 1.80 | 0.279            |
| RGS8*    | Regulator of G-protein signaling 8                                               | P57771 | 0.91 | 0.75 | 1.11 | 0.712            |
| ROBO1    | Roundabout homolog 1                                                             | Q9Y6N7 | 1.71 | 1.05 | 2.86 | 0.196            |
| SAMD9L   | Sterile alpha motif domain-containing protein 9-like                             | Q8IVG5 | 1.09 | 0.88 | 1.34 | 0.780            |
| SCG3     | Secretogranin-3                                                                  | Q8WXD2 | 0.69 | 0.46 | 1.04 | 0.340            |
| SCGB1A1  | Uteroglobin                                                                      | P11684 | 1.51 | 1.17 | 1.96 | <b>0.029</b>     |
| SCGB3A2  | Secretoglobin family 3A member 2                                                 | Q96PL1 | 1.55 | 1.31 | 1.85 | <b>&lt;0.001</b> |
| SCGN     | Secretagoin                                                                      | O76038 | 1.18 | 0.85 | 1.65 | 0.686            |
| SCRN1    | Secernin-1                                                                       | Q12765 | 1.10 | 0.84 | 1.43 | 0.828            |
| SELPLG   | P-selectin glycoprotein ligand 1                                                 | Q14242 | 0.83 | 0.49 | 1.40 | 0.828            |
| SERPINB8 | Serpin B8                                                                        | P50452 | 1.43 | 1.15 | 1.79 | <b>0.027</b>     |

|           |                                                                                         |        |      |      |      |                  |
|-----------|-----------------------------------------------------------------------------------------|--------|------|------|------|------------------|
| SH2D1A    | SH2 domain-containing protein 1A                                                        | O60880 | 0.93 | 0.78 | 1.10 | 0.768            |
| SHMT1     | Serine hydroxymethyltransferase, cytosolic                                              | P34896 | 0.94 | 0.78 | 1.13 | 0.828            |
| SIGLEC1   | Sialoadhesin                                                                            | Q9BZZ2 | 1.00 | 0.74 | 1.34 | 0.998            |
| SIGLEC10  | Sialic acid-binding Ig-like lectin 10                                                   | Q96LC7 | 1.72 | 1.17 | 2.58 | 0.072            |
| SIRPB1    | Signal-regulatory protein beta-1                                                        | O00241 | 1.06 | 0.78 | 1.46 | 0.943            |
| SIT1      | Signaling threshold-regulating transmembrane adapter 1                                  | Q9Y3P8 | 0.82 | 0.59 | 1.12 | 0.545            |
| SKAP2     | Src kinase-associated phosphoprotein 2                                                  | O75563 | 1.01 | 0.85 | 1.21 | 0.979            |
| SLAMF1*   | Signaling lymphocytic activation molecule                                               | Q13291 | 1.04 | 0.82 | 1.33 | 0.943            |
| SLAMF7    | SLAM family member 7                                                                    | Q9NQ25 | 0.99 | 0.77 | 1.29 | 0.998            |
| SLC39A5   | Zinc transporter ZIP5                                                                   | Q6ZMH5 | 1.14 | 0.87 | 1.52 | 0.711            |
| SMOC2     | SPARC-related modular calcium-binding protein 2                                         | Q9H3U7 | 0.93 | 0.68 | 1.26 | 0.925            |
| SMPDL3A   | Acid sphingomyelinase-like phosphodiesterase 3a                                         | Q92484 | 0.99 | 0.76 | 1.30 | 0.998            |
| SPINK4    | Serine protease inhibitor Kazal-type 4                                                  | O60575 | 1.28 | 1.02 | 1.60 | 0.175            |
| SPINT2    | Kunitz-type protease inhibitor 2                                                        | O43291 | 1.59 | 1.06 | 2.41 | 0.169            |
| SPON1     | Spondin-1                                                                               | Q9HCB6 | 2.64 | 1.78 | 4.01 | <b>&lt;0.001</b> |
| SPRY2     | Protein sprouty homolog 2                                                               | O43597 | 1.01 | 0.87 | 1.18 | 0.968            |
| SRPK2     | SRSF protein kinase 2                                                                   | P78362 | 1.03 | 0.87 | 1.22 | 0.943            |
| STX8      | Syntaxin-8                                                                              | Q9UNK0 | 1.20 | 0.91 | 1.58 | 0.534            |
| SULT2A1   | Bile salt sulfotransferase                                                              | Q06520 | 0.96 | 0.73 | 1.26 | 0.943            |
| TANK      | TRAF family member-associated NF-kappa-B activator                                      | Q92844 | 0.92 | 0.72 | 1.15 | 0.798            |
| TBC1D5    | TBC1 domain family member 5                                                             | Q92609 | 1.05 | 0.86 | 1.28 | 0.914            |
| TFF2      | Trefoil factor 2                                                                        | Q03403 | 1.73 | 1.33 | 2.27 | <b>0.002</b>     |
| TGFA      | Protransforming growth factor alpha [Cleaved into: Transforming growth factor alpha]    | P01135 | 2.45 | 1.62 | 3.77 | <b>0.002</b>     |
| TGFB1     | Transforming growth factor beta-1 proprotein [Cleaved into: Latency-associated peptide] | P01137 | 1.38 | 0.93 | 2.06 | 0.417            |
| TIMP3     | Metalloproteinase inhibitor 3                                                           | P35625 | 1.07 | 0.93 | 1.24 | 0.711            |
| TLR3      | Toll-like receptor 3                                                                    | O15455 | 0.94 | 0.72 | 1.24 | 0.939            |
| TNF       | Tumor necrosis factor                                                                   | P01375 | 1.01 | 0.83 | 1.21 | 0.993            |
| TNFAIP8*  | Tumor necrosis factor alpha-induced protein 8                                           | O95379 | 0.90 | 0.63 | 1.26 | 0.850            |
| TNFRSF11A | Tumor necrosis factor receptor superfamily member 11A                                   | Q9Y6Q6 | 1.41 | 1.03 | 1.96 | 0.196            |
| TNFRSF11B | Tumor necrosis factor receptor superfamily member 11B                                   | O00300 | 1.85 | 1.24 | 2.82 | <b>0.039</b>     |
| TNFRSF13B | Tumor necrosis factor receptor superfamily member 13B                                   | O14836 | 1.43 | 1.04 | 1.99 | 0.170            |
| TNFRSF13C | Tumor necrosis factor receptor superfamily member 13C                                   | Q96RJ3 | 1.01 | 0.74 | 1.38 | 0.997            |
| TNFRSF14  | Tumor necrosis factor receptor superfamily member 14                                    | Q92956 | 1.23 | 0.82 | 1.85 | 0.686            |
| TNFRSF4   | Tumor necrosis factor receptor superfamily member 4                                     | P43489 | 0.88 | 0.66 | 1.15 | 0.711            |
| TNFSF10   | Tumor necrosis factor ligand superfamily member 10                                      | P50591 | 0.41 | 0.23 | 0.73 | <b>0.036</b>     |
| TNFSF11   | Tumor necrosis factor ligand superfamily member 11                                      | O14788 | 0.64 | 0.51 | 0.80 | <b>0.005</b>     |
| TNFSF12   | Tumor necrosis factor ligand superfamily member 12                                      | O43508 | 0.51 | 0.29 | 0.87 | 0.119            |
| TNFSF13   | Tumor necrosis factor ligand superfamily member 13                                      | O75888 | 1.43 | 0.91 | 2.27 | 0.424            |
| TPP1      | Tripeptidyl-peptidase 1                                                                 | O14773 | 1.31 | 0.91 | 1.92 | 0.464            |

|         |                                                                        |        |      |      |      |       |
|---------|------------------------------------------------------------------------|--------|------|------|------|-------|
| TPSAB1  | Tryptase alpha/beta-1                                                  | Q15661 | 0.80 | 0.59 | 1.09 | 0.497 |
| TPT1*   | Translationally-controlled tumor protein                               | P13693 | 0.93 | 0.73 | 1.18 | 0.884 |
| TRAF2   | TNF receptor-associated factor 2                                       | Q12933 | 0.92 | 0.73 | 1.16 | 0.828 |
| TREM2   | Triggering receptor expressed on myeloid cells 2                       | Q9NZC2 | 1.29 | 1.00 | 1.67 | 0.258 |
| TRIM21  | E3 ubiquitin-protein ligase TRIM21                                     | P19474 | 1.19 | 1.06 | 1.35 | 0.058 |
| TRIM5   | Tripartite motif-containing protein 5                                  | Q9C035 | 1.12 | 0.90 | 1.40 | 0.672 |
| VASH1*  | Tubuliny-Tyr carboxypeptidase 1                                        | Q7L8A9 | 0.98 | 0.81 | 1.18 | 0.945 |
| VEGFA   | Vascular endothelial growth factor A                                   | P15692 | 1.39 | 1.05 | 1.86 | 0.152 |
| VEGFD   | Vascular endothelial growth factor D                                   | O43915 | 1.38 | 0.92 | 2.11 | 0.424 |
| WAS*    | Wiskott-Aldrich syndrome protein                                       | P42768 | 0.96 | 0.82 | 1.13 | 0.914 |
| WFIKKN2 | WAP, Kazal, immunoglobulin, Kunitz and NTR domain-containing protein 2 | Q8TEU8 | 0.66 | 0.43 | 1.00 | 0.258 |
| WNT9A   | Protein Wnt-9a                                                         | O14904 | 1.48 | 0.98 | 2.25 | 0.278 |
| YTHDF3  | YTH domain-containing family protein 3                                 | Q7Z739 | 1.03 | 0.84 | 1.26 | 0.943 |

\* Excluded due to >10% missing data

**Table S2. PF-ILD association for validated biomarkers in combined cohort (n=589)**

| Protein   | Unadjusted |           |         | Adjusted* |           |         |
|-----------|------------|-----------|---------|-----------|-----------|---------|
|           | OR**       | 95% CI    | p-value | OR**      | 95% CI    | p-value |
| AGER      | 0.60       | 0.48-0.74 | <0.001  | 0.63      | 0.51-0.79 | <0.001  |
| ANGPTL4   | 1.79       | 1.37-2.34 | <0.001  | 1.54      | 1.17-2.04 | 0.002   |
| CXCL17    | 1.65       | 1.34-2.04 | <0.001  | 1.43      | 1.14-1.79 | 0.002   |
| DPP10     | 1.79       | 1.37-2.34 | <0.001  | 1.63      | 1.25-2.14 | <0.001  |
| FASLG     | 0.61       | 0.48-0.79 | <0.001  | 0.67      | 0.51-0.87 | 0.003   |
| FCAR      | 1.68       | 1.33-2.13 | <0.001  | 1.55      | 1.22-1.98 | <0.001  |
| HGF       | 2.19       | 1.60-2.99 | <0.001  | 1.85      | 1.33-2.58 | <0.001  |
| IL17c     | 1.43       | 1.23-1.67 | <0.001  | 1.36      | 1.15-1.61 | <0.001  |
| ITGB6     | 3.13       | 2.31-4.23 | <0.001  | 2.68      | 1.95-3.67 | <0.001  |
| KRT19     | 2.00       | 1.67-2.38 | <0.001  | 1.86      | 1.55-2.23 | <0.001  |
| MMP10     | 1.63       | 1.35-1.97 | <0.001  | 1.45      | 1.18-1.76 | <0.001  |
| PLAUR     | 3.28       | 2.24-4.80 | <0.001  | 2.64      | 1.77-3.93 | <0.001  |
| PRSS8     | 2.12       | 1.56-2.88 | <0.001  | 1.81      | 1.31-2.48 | <0.001  |
| SCGB3A2   | 1.56       | 1.36-1.80 | <0.001  | 1.45      | 1.25-1.67 | <0.001  |
| SPON1     | 2.46       | 1.78-3.40 | <0.001  | 2.00      | 1.42-2.80 | <0.001  |
| TGFA      | 1.80       | 1.40-2.33 | <0.001  | 1.72      | 1.29-2.29 | <0.001  |
| TNFRSF11B | 1.99       | 1.44-2.74 | <0.001  | 1.67      | 1.20-2.34 | 0.003   |

\* Adjusted for center, ILD diagnosis and baseline GAP stage

\*\* Per unit-change in log2 transformed biomarker concentration

**Table S3. Association between validated biomarkers of PF-ILD and individual outcomes**

| Biomarker | Outcome                  |                           |
|-----------|--------------------------|---------------------------|
|           | Death/Transplant (n=589) | ≥10% FVC decline* (n=480) |
|           | OR** (95% CI)            |                           |
| AGER      | 0.68 (0.53-0.89)         | 0.60 (0.46-0.77)          |
| ANGPTL4   | 2.08 (1.47-2.95)         | 1.49 (1.08-2.04)          |
| CXCL17    | 2.54 (1.88-3.43)         | 1.23 (0.97-1.56)          |
| DPP10     | 1.79 (1.31-2.46)         | 1.57 (1.16-2.12)          |
| FASLG     | 0.51 (0.38-0.70)         | 0.76 (0.56-1.03)          |
| FCAR      | 2.08 (1.55-2.79)         | 1.33 (1.01-1.75)          |
| HGF       | 3.53 (2.39-5.24)         | 1.42 (0.98-2.06)          |
| IL17C     | 1.68 (1.39-2.03)         | 1.21 (1.01-1.44)          |
| ITGB6     | 4.51 (3.10-6.57)         | 2.05 (1.45-2.92)          |
| KRT19     | 2.32 (1.86-2.90)         | 1.57 (1.29-1.91)          |
| MMP10     | 2.00 (1.59-2.51)         | 1.29 (1.04-1.60)          |
| PLAUR     | 7.44 (4.48-12.37)        | 1.65 (1.07-2.53)          |
| PRSS8     | 2.23 (1.51-3.30)         | 1.75 (1.23-2.48)          |
| SCGB3A2   | 1.86 (1.54-2.23)         | 1.29 (1.10-1.50)          |
| SPON1     | 7.34 (4.53-11.87)        | 1.23 (0.84-1.78)          |
| TGFA      | 2.24 (1.68-2.99)         | 1.31 (0.98-1.74)          |
| TNFRSF11B | 2.22 (1.48-3.32)         | 1.59 (1.10-2.29)          |

\* Death/transplant events excluded

\*\* Per unit-change in log2 transformed biomarker concentration

**Table S4. HRCT morphology-stratified association between validated biomarkers and PF-ILD phenotype in combined cohort (n=589)**

| Protein  | Definite/Probable<br>UIP (n=135) | NSIP (n=212)     | Other (n=242)    | heterogeneity<br>p value* |
|----------|----------------------------------|------------------|------------------|---------------------------|
|          | OR** (95% CI)                    |                  |                  |                           |
| AGER     | 0.41 (0.27-0.64)                 | 0.70 (0.49-1.00) | 0.67 (0.45-0.97) | 0.15                      |
| ANGPTL4  | 1.23 (0.80-1.91)                 | 2.21 (1.32-3.68) | 2.07 (1.30-3.30) | 0.15                      |
| CXCL17   | 1.66 (1.14-2.41)                 | 1.97 (1.31-2.97) | 1.21 (0.84-1.74) | 0.19                      |
| DPP10    | 2.76 (1.58-4.80)                 | 1.32 (0.88-1.98) | 1.71 (1.07-2.72) | 0.11                      |
| FASLG    | 0.39 (0.24-0.64)                 | 0.82 (0.55-1.23) | 0.72 (0.44-1.18) | 0.06                      |
| FCAR     | 1.41 (0.92-2.16)                 | 1.38 (0.92-2.09) | 2.30 (1.49-3.56) | 0.18                      |
| HGF      | 2.75 (1.52-4.98)                 | 1.31 (0.76-2.24) | 2.64 (1.54-4.54) | 0.11                      |
| IL17c    | 1.50 (1.13-2.00)                 | 1.54 (1.15-2.06) | 1.21 (0.94-1.56) | 0.39                      |
| ITGB6    | 9.73 (4.47-21.16)                | 2.16 (1.24-3.75) | 2.03 (1.32-3.11) | 0.002                     |
| KRT19    | 2.39 (1.67-3.43)                 | 1.68 (1.24-2.27) | 1.95 (1.47-2.59) | 0.34                      |
| MMP10    | 1.49 (1.06-2.08)                 | 1.53 (1.08-2.17) | 1.66 (1.22-2.27) | 0.88                      |
| PLAUR    | 2.72 (1.36-5.42)                 | 3.03 (1.59-5.77) | 3.65 (1.87-7.14) | 0.83                      |
| PRSS8    | 2.49 (1.42-4.40)                 | 2.64 (1.42-4.89) | 1.23 (0.74-2.02) | 0.08                      |
| SCGB3A2  | 1.45 (1.12-1.87)                 | 1.50 (1.16-1.92) | 1.69 (1.32-2.15) | 0.67                      |
| SPON1    | 1.96 (1.10-3.49)                 | 1.71 (0.98-2.96) | 4.05 (2.25-7.30) | 0.08                      |
| TGFA     | 1.81 (1.16-2.82)                 | 1.54 (1.02-2.32) | 2.60 (1.51-4.46) | 0.32                      |
| TNFRS11B | 1.50 (0.86-2.60)                 | 1.77 (1.00-3.13) | 2.43 (1.36-4.34) | 0.49                      |

\* Test of whether PF-ILD biomarker association varies by HRCT morphology

\*\* Per unit-change in log2 transformed biomarker concentration



**Table S5. GAP index-stratified PF-ILD association for validated biomarkers in combined cohort (n=589)**

| Protein  | Stage I (n=267)  | Stage II (n=252) | Stage III (n=70)  | heterogeneity p value* |
|----------|------------------|------------------|-------------------|------------------------|
|          | OR** (95% CI)    |                  |                   |                        |
| AGER     | 0.48 (0.33-0.69) | 0.73 (0.54-0.98) | 1.05 (0.53-2.12)  | 0.022                  |
| ANGPTL4  | 1.58 (1.05-2.37) | 1.61 (1.05-2.48) | 1.21 (0.50-2.90)  | 0.63                   |
| CXCL17   | 1.23 (0.91-1.67) | 1.69 (1.19-2.39) | 1.46 (0.67-3.18)  | 0.35                   |
| DPP10    | 1.41 (0.92-2.16) | 2.01 (1.35-3.01) | 1.08 (0.48-2.44)  | 0.88                   |
| FASLG    | 0.51 (0.33-0.78) | 0.92 (0.64-1.32) | 0.42 (0.17-1.01)  | 0.41                   |
| FCAR     | 1.50 (1.05-2.09) | 1.63 (1.12-2.35) | 1.73 (0.81-3.67)  | 0.65                   |
| HGF      | 1.86 (1.15-3.00) | 1.93 (1.17-3.19) | 1.40 (0.56-3.53)  | 0.61                   |
| IL17c    | 1.41 (1.09-1.83) | 1.22 (0.97-1.53) | 1.51 (0.96-2.35)  | 0.77                   |
| ITGB6    | 1.76 (1.09-2.83) | 3.30 (2.05-5.32) | 5.12 (1.89-13.86) | 0.035                  |
| KRT19    | 1.65 (1.27-2.14) | 1.87 (1.42-2.46) | 3.32 (1.70-6.48)  | 0.096                  |
| MMP10    | 1.27 (0.93-1.74) | 1.80 (1.33-2.43) | 1.05 (0.63-1.77)  | 0.99                   |
| PLAUR    | 2.20 (1.23-3.91) | 2.91 (1.59-5.33) | 4.18 (1.19-14.63) | 0.37                   |
| PRSS8    | 1.44 (0.92-2.26) | 2.11 (1.30-3.43) | 2.74 (0.95-7.96)  | 0.21                   |
| SCGB3A2  | 1.22 (1.0-1.50)  | 1.60 (1.28-2.00) | 2.47 (1.36-4.49)  | 0.013                  |
| SPON1    | 1.49 (0.92-2.42) | 2.25 (1.35-3.72) | 5.72 (1.72-19.02) | 0.067                  |
| TGFA     | 1.54 (1.04-2.27) | 1.45 (0.99-2.12) | 2.88 (1.13-7.34)  | 0.51                   |
| TNFRS11B | 1.48 (0.92-2.38) | 1.62 (0.97-2.72) | 4.36 (1.38-13.73) | 0.18                   |

\* Test of whether PF-ILD biomarker association varies by GAP stage

\*\* Per unit-change in log2 transformed biomarker concentration

**Figure S2.** Scatter plots and linear regression estimates assessing the association between validated biomarkers and baseline GAP stage.

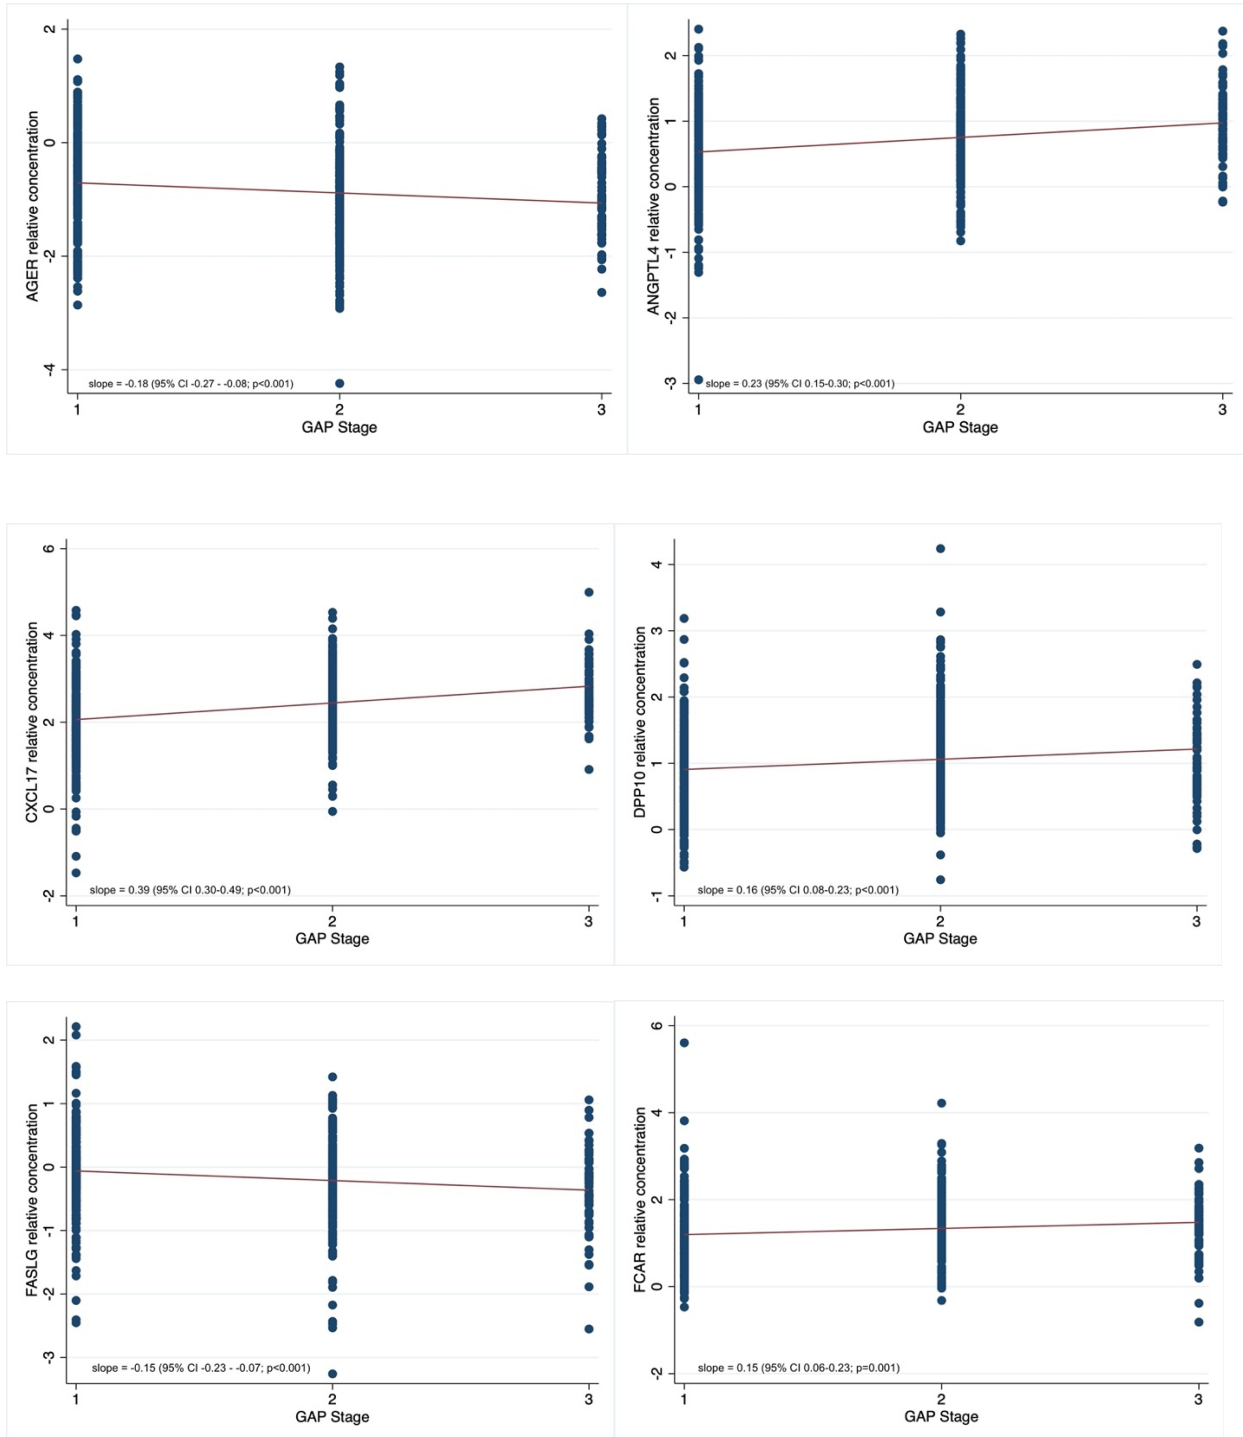

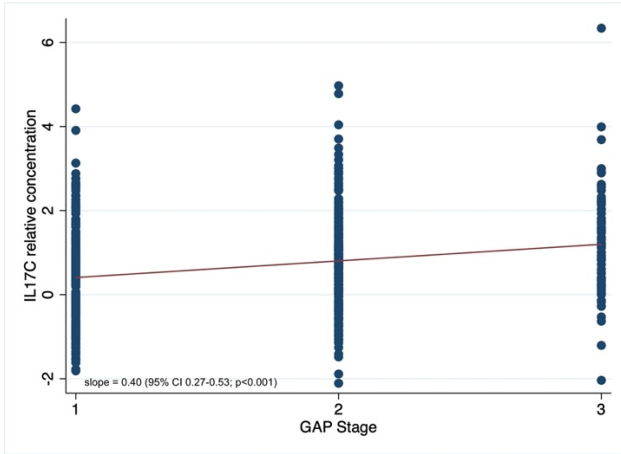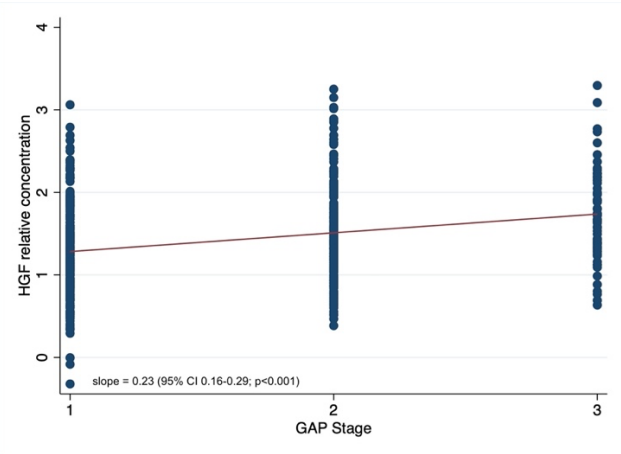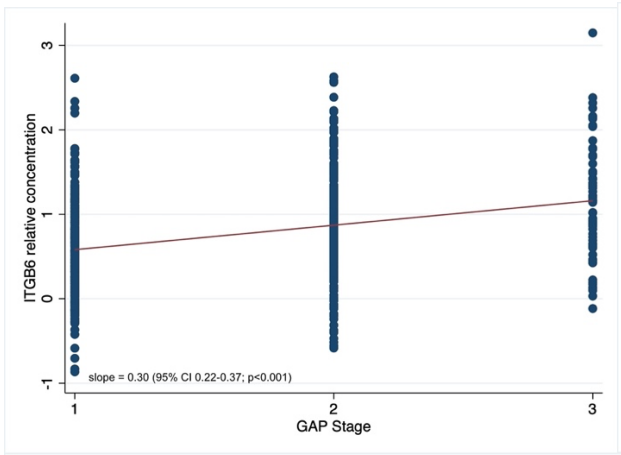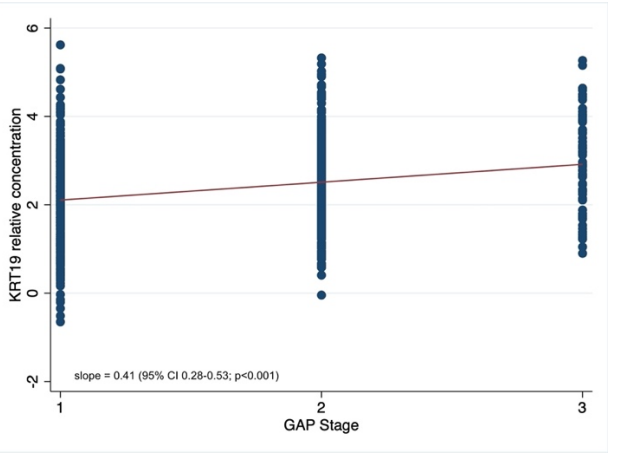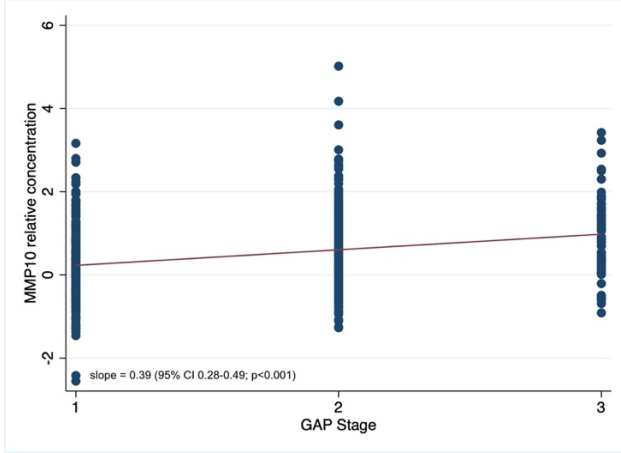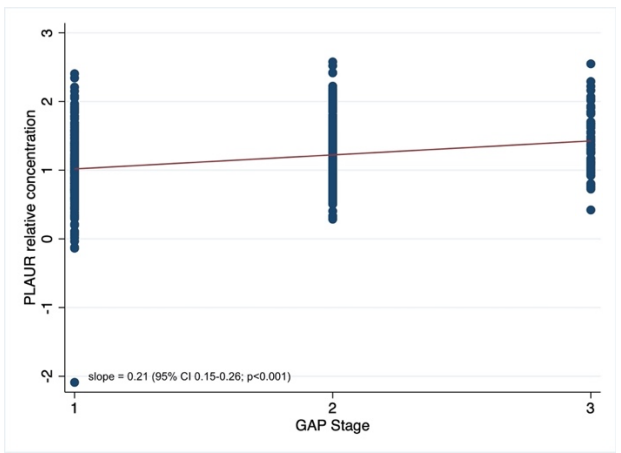

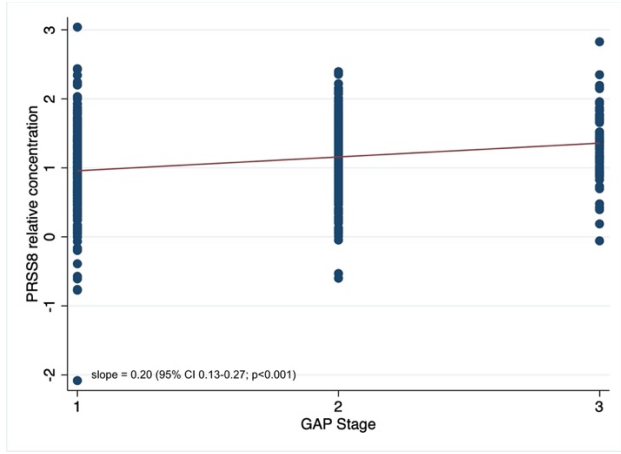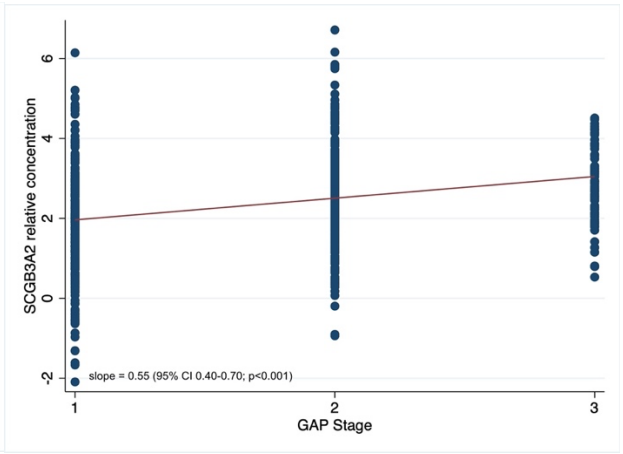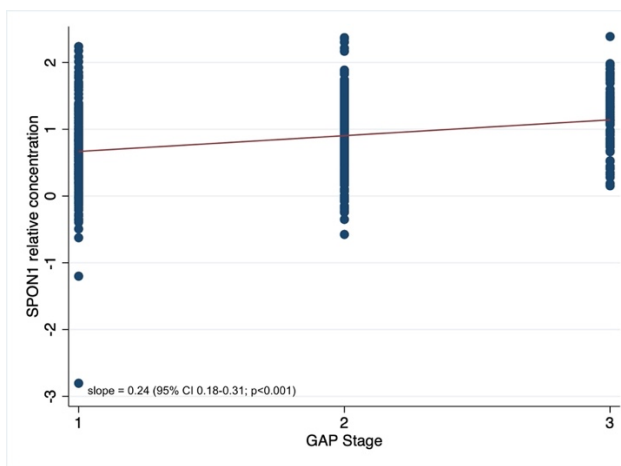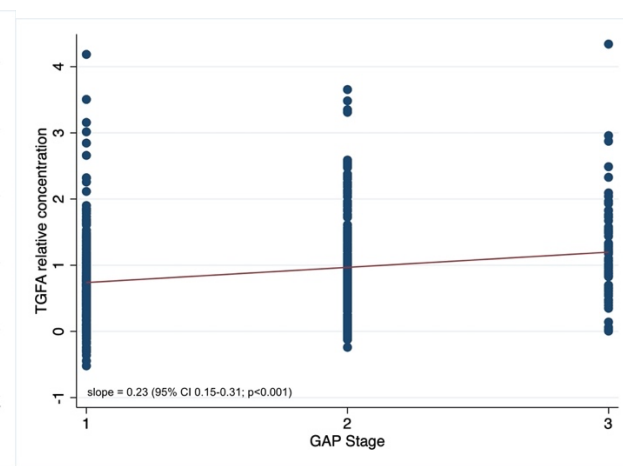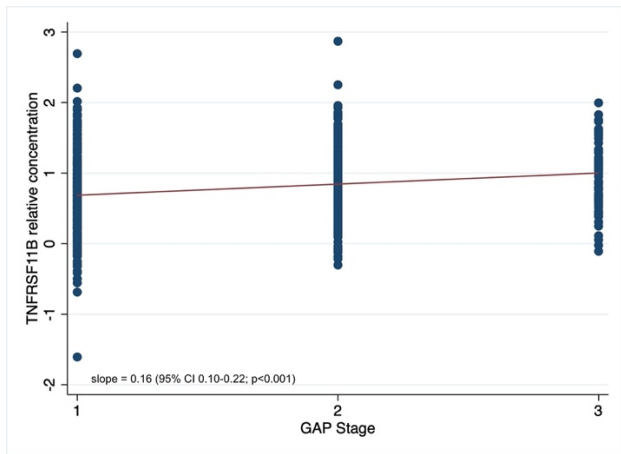

**Figure S3.** Pathway (a) and network (b) analysis of proteins associated with PF-ILD in the combined cohort at false discovery rate of <0.05.

**a.**

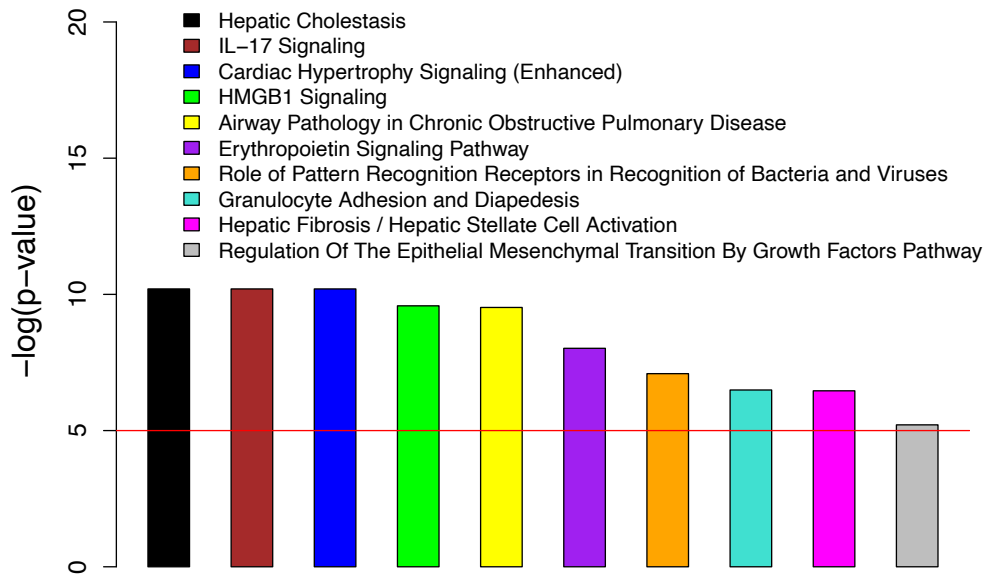

**b.**

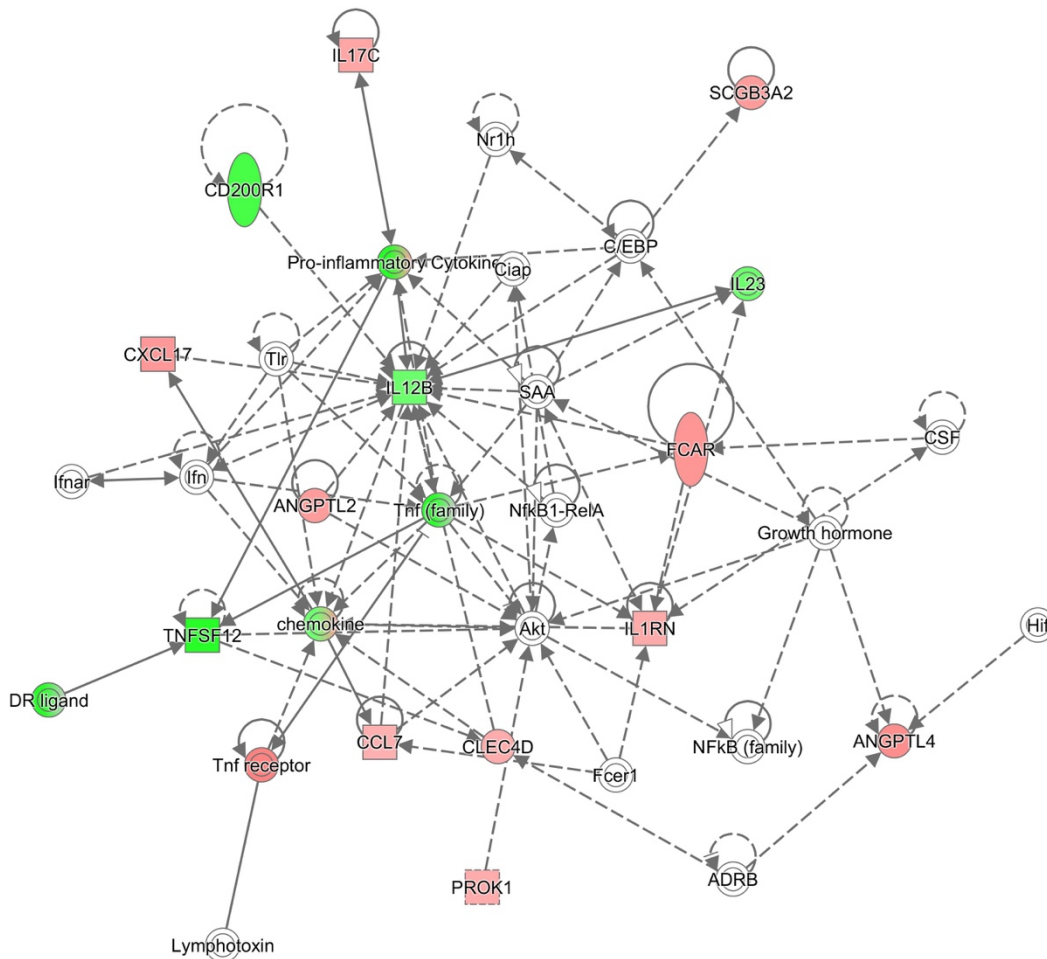

**Table S6. Derivation cohort proteomic signature test performance characteristics by proteomic score threshold**

| <b>Score Threshold</b> | <b>High-risk n (%)</b> | <b>Low-risk n (%)</b> | <b>Sensitivity</b> | <b>Specificity</b> | <b>PPV</b> | <b>NPV</b> |
|------------------------|------------------------|-----------------------|--------------------|--------------------|------------|------------|
| 0.20                   | 198 (73.3)             | 72 (27.7)             | 0.91               | 0.37               | 0.46       | 0.88       |
| 0.30*                  | 157 (58.2)             | 113 (41.9)            | 0.85               | 0.58               | 0.54       | 0.87       |
| 0.35                   | 137 (50.7)             | 133 (49.3)            | 0.80               | 0.66               | 0.58       | 0.85       |
| 0.40                   | 103 (38.2)             | 167 (61.9)            | 0.64               | 0.77               | 0.62       | 0.78       |
| 0.50                   | 66 (24.4)              | 204 (75.6)            | 0.48               | 0.89               | 0.73       | 0.75       |

\* Threshold chosen for proteomic signature classification

Abbreviations: PPV = positive predictive value; NPV = negative predictive value

**Table S7. PF-ILD Proteomic Signature Test performance**

| PF-ILD PS   | Derivation Cohort |     | Validation Cohort |     |
|-------------|-------------------|-----|-------------------|-----|
|             | PF-ILD Phenotype  |     |                   |     |
|             | (+)               | (-) | (+)               | (-) |
| High-Risk   | 85                | 72  | 37                | 37  |
| Low-Risk    | 15                | 98  | 4                 | 41  |
| Sensitivity | 0.85              |     | 0.90              |     |
| Specificity | 0.58              |     | 0.53              |     |
| PPV         | 0.54              |     | 0.50              |     |
| NPV         | 0.87              |     | 0.91              |     |

Abbreviations: PS = proteomic signature; PF-ILD = progressive fibrosing ILD; PPV = positive predictive value; NPV = negative predictive value

**Figure S4.** Theoretical ILD clinical trial sample size based on estimated one-year change in FVC for overall cohort (a) and when restricted to those with a high-risk proteomic signature (b)

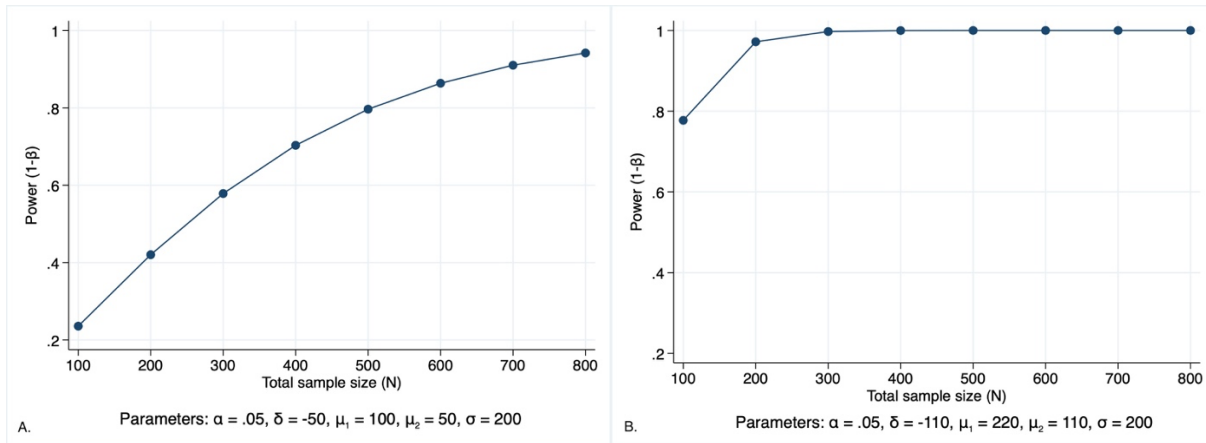

Supplement: NIHMS1791609-supplement-Appendix.pdf [file NIHMS1791609-supplement-Appendix.pdf]
